# Supplementary material
Source: PubMed Central journal article supplement (PMC3950812)
Supplement: NIHMS552510-supplement-1_si_001.pdf [file NIHMS552510-supplement-1_si_001.pdf]

*Supporting Information*

# A Superior Fluorescent Probe for Detection of Cardiolipin

*Chris Wai Tung Leung,<sup>†,#</sup> Yuning Hong,<sup>†,‡,#</sup> Jonas Hanske,<sup>‡,⊥</sup> Engui Zhao,<sup>†</sup> Sijie Chen,<sup>†</sup>*

*Ekaterina V. Pletneva<sup>\*,‡</sup> and Ben Zhong Tang<sup>\*,†,§,^</sup>*

<sup>†</sup>Department of Chemistry, Institute for Advanced Study, Division of Biomedical Engineering, Division of Life Science, State Key Laboratory of Molecular Neuroscience and Institute of Molecular Functional Materials, The Hong Kong University of Science and Technology, Clear Water Bay, Kowloon, Hong Kong, China

<sup>‡</sup>Department of Chemistry, Dartmouth College, Hanover, New Hampshire 03755, United States

<sup>⊥</sup>Department of Biology, Chemistry, and Pharmacy, Institute of Chemistry and Biochemistry, Freie Universität Berlin, D-14195 Berlin, Germany

<sup>§</sup>Guangdong Innovative Research Team, SCUT-HKUST Joint Research Laboratory, State Key Laboratory of Luminescent Materials and Devices, South China University of Technology, Guangzhou 510640, China

<sup>^</sup>HKUST Shenzhen Research Institute, No. 9 Yuexing 1st RD, South Area, Hi-tech Park, Nanshan, Shenzhen 518057, China

## Table of Contents

|                                                                                                                                                                                                                                                                                                                                                                                                                           |    |
|---------------------------------------------------------------------------------------------------------------------------------------------------------------------------------------------------------------------------------------------------------------------------------------------------------------------------------------------------------------------------------------------------------------------------|----|
| <b>Experimental section</b>                                                                                                                                                                                                                                                                                                                                                                                               | S3 |
| <b>Scheme S1.</b> Synthetic route of TTAPE-Me.                                                                                                                                                                                                                                                                                                                                                                            | S3 |
| <b>Chart S1.</b> Chemical structures of DOPC (1,2-dioleoyl- <i>sn</i> -glycero-4-phosphocholine), DPPE (1,2-dipalmitoleoyl- <i>sn</i> -glycero-3-phosphoethanolamine), soy PI (L- $\alpha$ -phosphatidylinositol (Soy) (sodium salt)), DOPS (1,2-dioleoyl- <i>sn</i> -glycero-3-phospho-L-serine (sodium salt)), and SM ( <i>N</i> -hexanoyl-D-sphingomyelin).                                                            | S4 |
| <b>Figure S1.</b> Particle analysis of (A) CL-containing and (B) CL-free vesicles. CL-containing and CL-free LUVs are composed of TOCL/DOPC (50 mol % TOCL) and pure DOPC, respectively, in a 25 mM HEPES buffer at pH 7.4 (vesicles for Figure 1–3). [lipid] <sub>total</sub> = 22 $\mu$ M.                                                                                                                              | S5 |
| <b>Figure S2.</b> (A) Emission spectra of TTAPE-Me in the presence of LUVs with different CL content (2–50 mol % TOCL). (B) Plot of the fluorescence enhancement at 480 nm versus CL content. [dye] = 10 $\mu$ M; [lipid] <sub>total</sub> = 22 $\mu$ M; $\lambda_{\text{ex}}$ = 350 nm.                                                                                                                                  | S5 |
| <b>Figure S3.</b> Changes with time in fluorescence intensity of TTAPE-Me (10 $\mu$ M) upon addition to CL-containing LUVs ([lipid] <sub>total</sub> = 22 $\mu$ M, 50 mol % of TOCL).                                                                                                                                                                                                                                     | S6 |
| <b>Figure S4.</b> Emission spectra of BSPOTPE alone and with added CL-containing and CL-free LUVs. CL-containing and CL-free LUVs are composed of TOCL/DOPC (50 mol % TOCL) and pure DOPC, respectively, in a 25 mM HEPES buffer at pH 7.4. [dye] = 10 $\mu$ M; [lipid] <sub>total</sub> = 22 $\mu$ M; $\lambda_{\text{ex}}$ = 350 nm.                                                                                    | S6 |
| <b>Figure S5.</b> Emission spectra of TTAPE-Me in the presence of different amount of DNA (pUC 18 DNA, 2686 bp) in 25 mM HEPES buffer, pH 7.4. The one of TTAPE-Me with CL-containing LUVs composed of TOCL/DOPC (50 mol % TOCL; 22 $\mu$ M) is shown for comparison (purple dash line). [dye] = 10 $\mu$ M; $\lambda_{\text{ex}}$ = 350 nm.                                                                              | S7 |
| <b>Figure S6.</b> Change in fluorescence intensity of TTAPE-Me (10 $\mu$ M) with different charged biomolecules ([lipid] <sub>total</sub> = 22 $\mu$ M; left to right: LUVs of TOCL:DOPC (50 mol % TOCL), LUVs of pure DOPC, 22 $\mu$ M lysine, 22 $\mu$ M glutamic acid, 22 $\mu$ M heparin, and 22 $\mu$ M cytochrome c) in 25 mM HEPES buffer, pH 7.4, $\lambda_{\text{ex}}$ = 350 nm, $\lambda_{\text{em}}$ = 480 nm. | S7 |
| <b>Figure S7.</b> Particle analysis of the all-component LUVs (A) with (17 mol % TOCL, 39.5 mol % DOPC, 38.8 mol % DPPE, 1.7 mol % Soy PI, 1 mol % DOPS & 2 mol % SM) and (B) without TOCL (56.5 mol % DOPC, 38.8 mol % DPPE, 1.7 mol % Soy PI, 1 mol % DOPS & 2 mol % SM) in a 25 mM HEPES buffer at pH 7.4. Emission spectra of TTAPE-Me an NAO with these LUVs are shown in Figures 4C and 4D, respectively.           | S8 |

## Experimental section

### Synthesis of 1,1,2,2-Tetrakis[4-(2-trimethylammonioethoxy)-phenyl]ethene Tetrabromide (TTAPE-Me):

Compound 1 was synthesized according to previous publications.<sup>1</sup> Quaternization of 1 with an excess amount of trimethylamine generated TTAPE-Me. Pale yellow powder; 85% yield. <sup>1</sup>H NMR (400 MHz, D<sub>2</sub>O),  $\delta$  (ppm): 7.09 (d, 8H), 6.83 (d, 8H), 4.46 (t, 8H), 3.80 (t, 8H), 3.25 (s, 36H). <sup>13</sup>C NMR (100 MHz, D<sub>2</sub>O),  $\delta$  (ppm): 155.4, 139.2, 137.4, 132.3, 113.7, 64.8, 61.6, 53.7. MS (TOF), m/e 855.6561 ([M-2Br-3CH<sub>3</sub>]<sup>+</sup>, calcd. 855.6725).

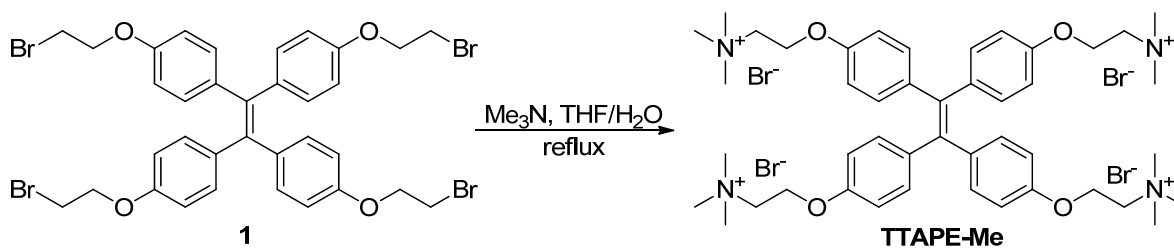

**Scheme S1.** Synthetic route of TTAPE-Me.

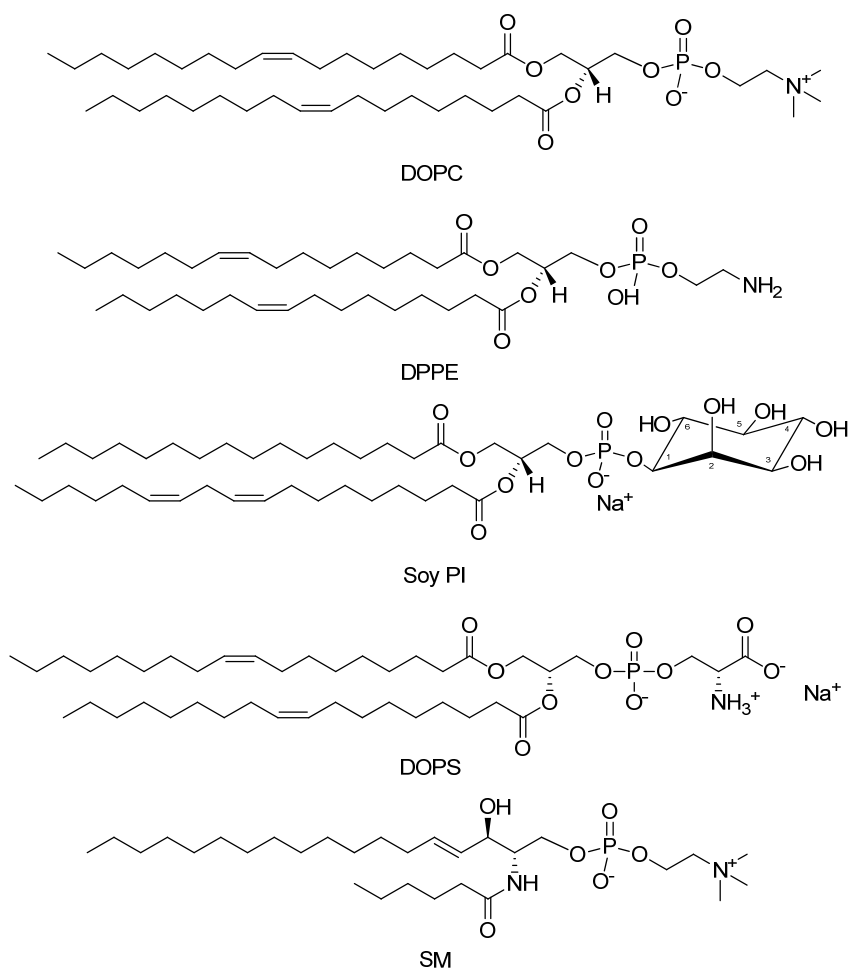

**Chart S1.** Chemical structures of DOPC (1,2-dioleoyl-*sn*-glycero-4-phosphocholine), DPPE (1,2-dipalmitoleoyl-*sn*-glycero-3-phosphoethanolamine), soy PI (L- $\alpha$ -phosphatidylinositol (Soy) (sodium salt)), DOPS (1,2-dioleoyl-*sn*-glycero-3-phospho-L-serine (sodium salt)), and SM (*N*-hexanoyl-D-sphingomyelin).

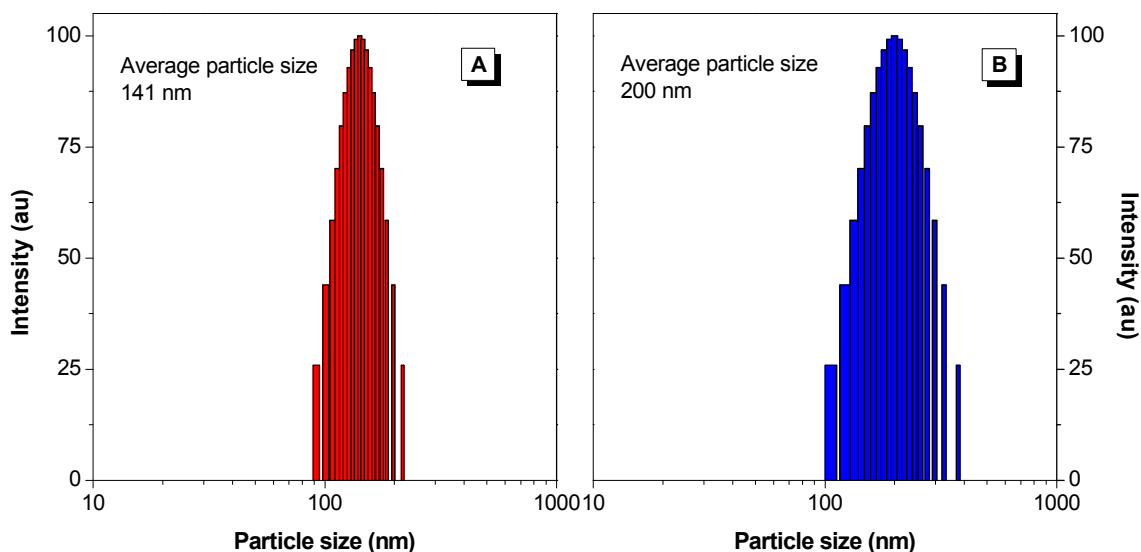

**Figure S1.** Particle analysis of (A) CL-containing and (B) CL-free vesicles. CL-containing and CL-free LUVs are composed of TOCL/DOPC (50 mol % TOCL) and pure DOPC, respectively, in a 25 mM HEPES buffer at pH 7.4 (vesicles for Figure 1–3).  $[\text{lipid}]_{\text{total}} = 22 \mu\text{M}$ .

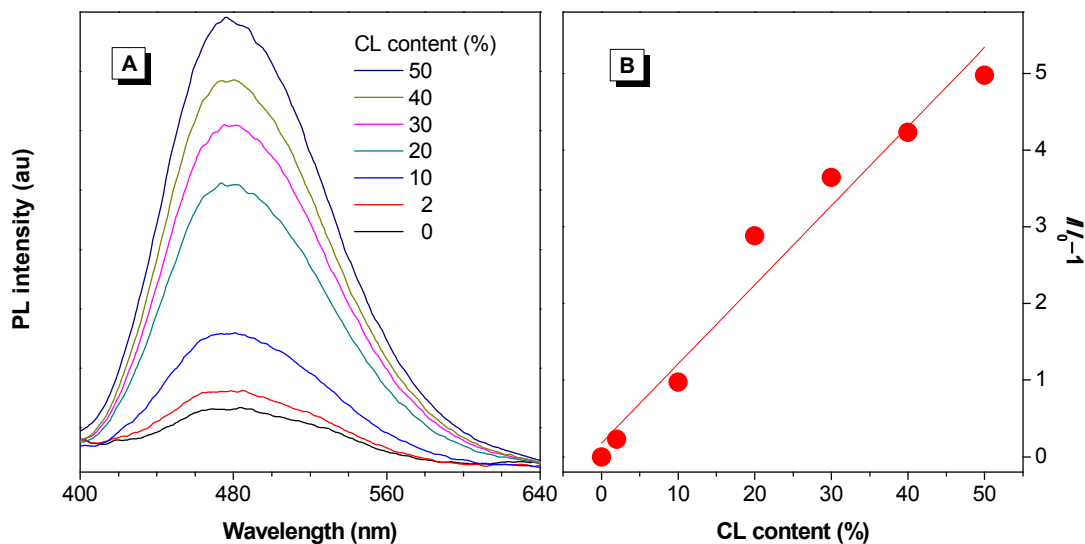

**Figure S2.** (A) Emission spectra of TTape-Me in the presence of LUVs with different CL content (2–50 mol % TOCL). (B) Plot of the fluorescence enhancement at 480 nm versus CL content.  $[\text{dye}] = 10 \mu\text{M}$ ;  $[\text{lipid}]_{\text{total}} = 22 \mu\text{M}$ ;  $\lambda_{\text{ex}} = 350 \text{ nm}$ .

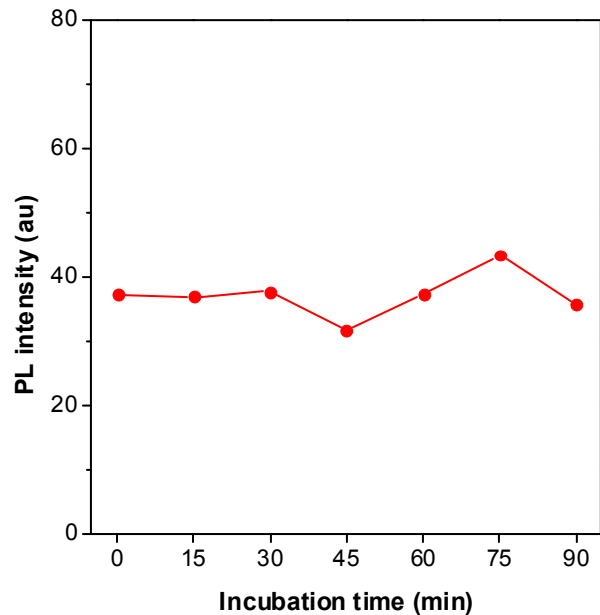

**Figure S3.** Changes with time in fluorescence intensity of TTAPE-Me (10  $\mu$ M) upon addition to CL-containing LUVs ( $[\text{lipid}]_{\text{total}} = 22 \mu\text{M}$ , 50 mol % of TOCL).

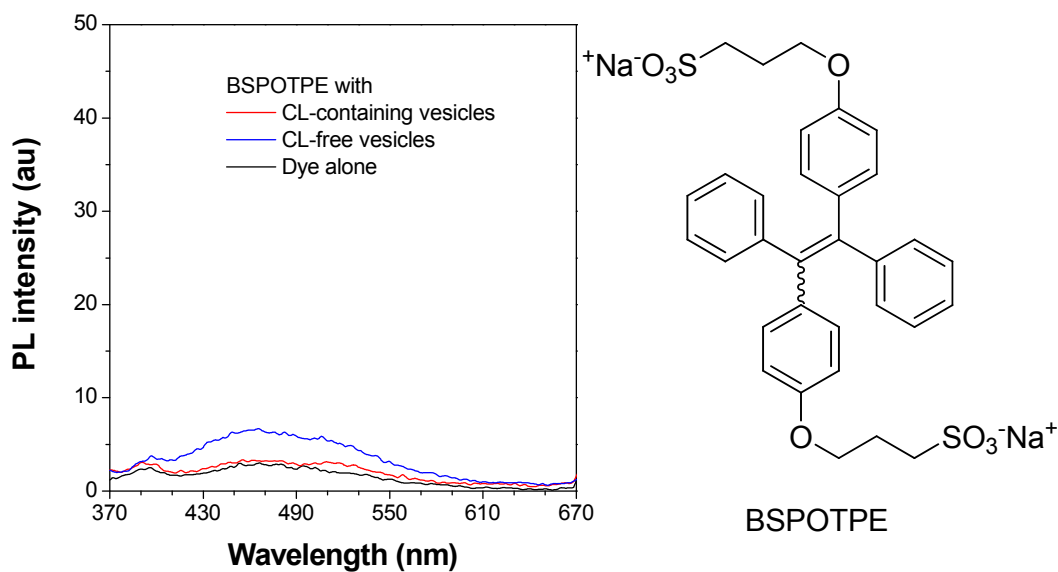

**Figure S4.** Emission spectra of BSPOTPE alone and with added CL-containing and CL-free LUVs. CL-containing and CL-free LUVs are composed of TOCL/DOPC (50 mol % TOCL) and pure DOPC, respectively, in a 25 mM HEPES buffer at pH 7.4.  $[\text{dye}] = 10 \mu\text{M}$ ;  $[\text{lipid}]_{\text{total}} = 22 \mu\text{M}$ ;  $\lambda_{\text{ex}} = 350 \text{ nm}$ .

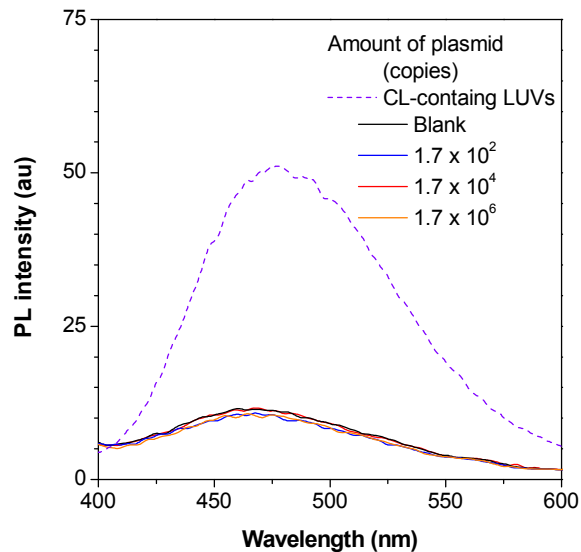

**Figure S5.** Emission spectra of TTAPE-Me in the presence of different amount of DNA (pUC 18 DNA, 2686 bp) in 25 mM HEPES buffer, pH 7.4. The one of TTAPE-Me with CL-containing LUVs composed of TOCL/DOPC (50 mol % TOCL; 22  $\mu$ M) is shown for comparison (purple dash line). [dye] = 10  $\mu$ M;  $\lambda_{\text{ex}}$  = 350 nm.

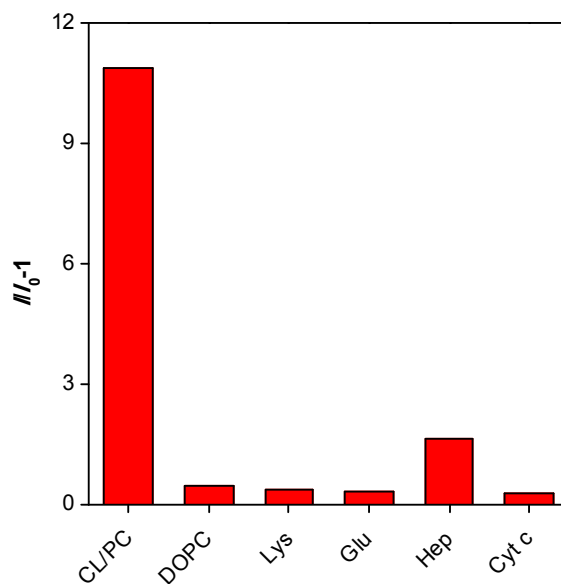

**Figure S6.** Change in fluorescence intensity of TTAPE-Me (10  $\mu$ M) with different charged biomolecules ( $[\text{lipid}]_{\text{total}}$  = 22  $\mu$ M; left to right: LUVs of TOCL:DOPC (50 mol % TOCL), LUVs of pure DOPC, 22  $\mu$ M lysine, 22  $\mu$ M glutamic acid, 22  $\mu$ M heparin, and 22  $\mu$ M cytochrome *c*) in 25 mM HEPES buffer, pH 7.4,  $\lambda_{\text{ex}}$  = 350 nm,  $\lambda_{\text{em}}$  = 480 nm.

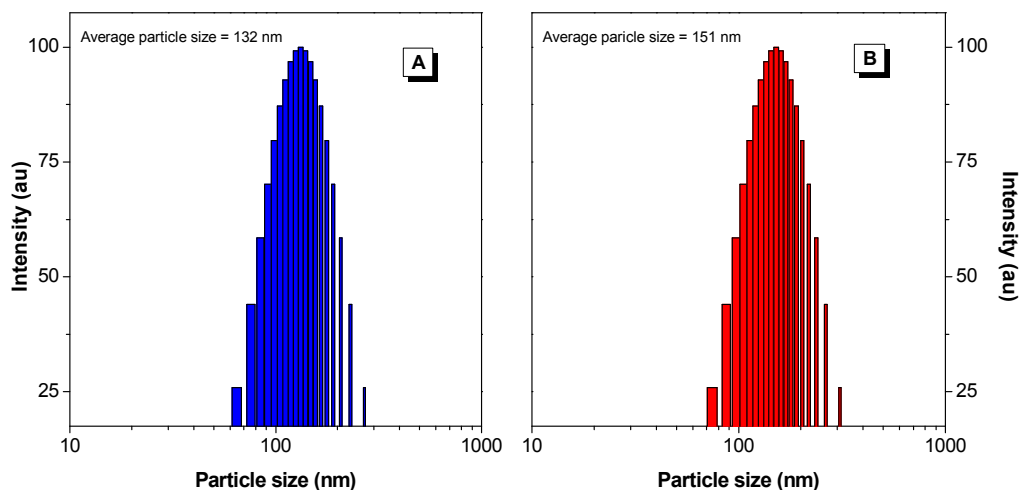

**Figure S7.** Particle analysis of the all-component LUVs (A) with (17 mol % TOCL, 39.5 mol % DOPC, 38.8 mol % DPPE, 1.7 mol % Soy PI, 1 mol % DOPS & 2 mol % SM) and (B) without TOCL (56.5 mol % DOPC, 38.8 mol % DPPE, 1.7 mol % Soy PI, 1 mol % DOPS & 2 mol % SM) in a 25 mM HEPES buffer at pH 7.4. Emission spectra of TTAPE-Me an NAO with these LUVs are shown in Figures 4C and 4D, respectively.

## REFERENCES

- (1) Hong, Y.; Häubler, M.; Lam, J. W. Y.; Li, Z.; Sin, K. K.; Dong, Y.; Tong, H.; Liu, J.; Qin, A.; Renneberg R.; Tang, B. Z. *Eur. J. Chem* **2008**, *14*, 6428.
